# Supplementary material for: Three-Year Outcomes of Aflibercept Treatment for Neovascular Age-Related Macular Degeneration: Evidence from a Clinical Setting
Source: PubMed Central journal article supplement — Ophthalmol Ther. 2018 Jul 7;7(2):361–8. doi: 10.1007/s40123-018-0139-5 (PMC6258584; doi:10.1007/s40123-018-0139-5), 2018-07-07
Supplement: 40123_2018_139_MOESM2_ESM.pdf [file 40123_2018_139_MOESM2_ESM.pdf]

## SUPPLEMENTARY TABLES

**Supplementary table 1: National (United Kingdom) criteria for treatment in patients with wet AMD.**

National Institute of Health and Care Excellence funding guidance for patients treated with aflibercept

- Best-corrected visual acuity is between 6/12 and 6/96
- No permanent structural damage to the central fovea
- Lesion size is less than or equal to 12 disc areas in greatest linear dimension
- Evidence of recent presumed disease progression (blood vessel growth, as indicated by fluorescein angiography, or recent visual acuity changes)
- Best-corrected visual acuity is between 6/12 and 6/96 (approximate ETDRS letter score of 73 to 25 letters inclusive)

**Supplementary table 2. Baseline data of all eyes at baseline and end point.**

|                                      | Demographic data of all eyes at baseline                           |                                                |                                        |                              |          |
|--------------------------------------|--------------------------------------------------------------------|------------------------------------------------|----------------------------------------|------------------------------|----------|
|                                      |                                                                    | Total analysis of all eyes – 3 years follow up |                                        |                              |          |
|                                      | All eyes included in the analysis (completing 1 year of follow up) | Lost to follow up between year 1 and 2         | Lost to follow up between year 2 and 3 | Completing 3 years follow-up | P        |
| No. of eyes                          | 148                                                                | 17                                             | 23                                     | 108                          | P > 0.05 |
| No. of patients                      | 139                                                                | 16                                             | 21                                     | 102                          |          |
| Female (%)                           | 58.9%                                                              | 41.1%                                          | 62.8%                                  | 59.2%                        |          |
| Mean baseline age (SD), years        | 80.6±8.3                                                           | 81.6±8.1                                       | 81.4±10.2                              | 80.3±7.9                     |          |
| Mean baseline VA (Snellen; SD)       | 54.4 ± 16                                                          | 49.2±18.4                                      | 56±17.9                                | 54.9±15.2                    |          |
| Baseline VA ≥ 73 letters (20/40; %)  | 10.8%                                                              | 0%                                             | 17.4%                                  | 10.2%                        |          |
| Baseline VA ≤ 35 letters (20/200; %) | 19.6%                                                              | 29.4%                                          | 21.7%                                  | 17.6%                        |          |
| Central Macular thickness            | 300.3 ± 92.6                                                       | 318.8±119                                      | 299.2±84.6                             | 297.4±89.9                   |          |
|                                      | Angiographic lesion type , %                                       |                                                |                                        |                              |          |
| Occult                               | 65.9%                                                              | 64.4%                                          | 65.7%                                  | 57.4%                        |          |
| Classic component                    | 22.5%                                                              | 29.8%                                          | 25.7%                                  | 29.6%                        |          |
| Other                                | 5.6%                                                               | 5.8%                                           | 5.7%                                   | 4.6%                         |          |
| Not recorded                         | 6%                                                                 | 0%                                             | 2.8%                                   | 8.3%                         |          |
