# Supplementary material for: Three-Year Outcomes of Aflibercept Treatment for Neovascular Age-Related Macular Degeneration: Evidence from a Clinical Setting
Source: Springer Nature journal article supplement (doi:10.1007/s40123-018-0139-5), 2018-07-07

## SUPPLEMENTARY FIGURES

### Supplementary figure 1. A COnsolidated Standards Of Reporting Trials (CONSORT) style diagram showing the patients and eyes included in the study.

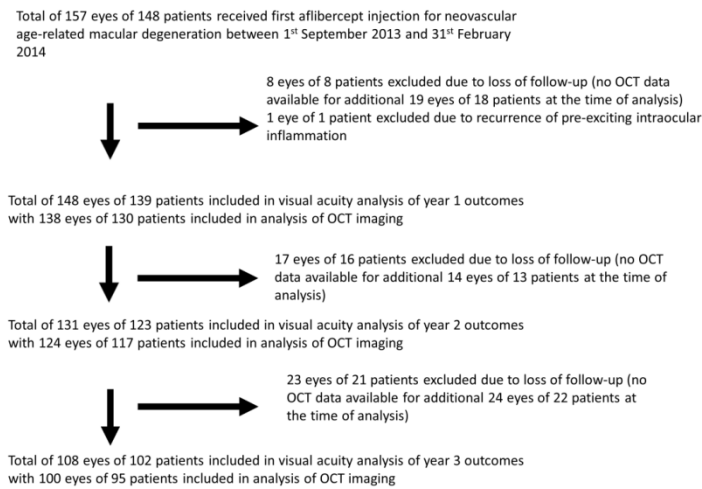

### Supplementary figure 2. Moorfields treatment protocol for aflibercept treatment for wet AMD.

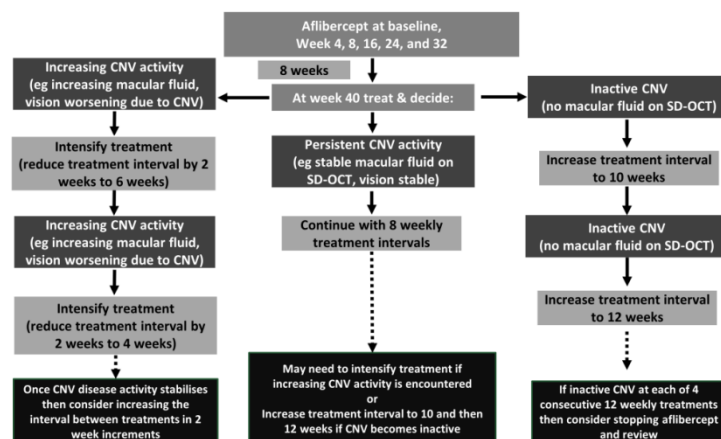

**Supplementary figure 3. A waterfall plot of the change in VA for each treated eye.**

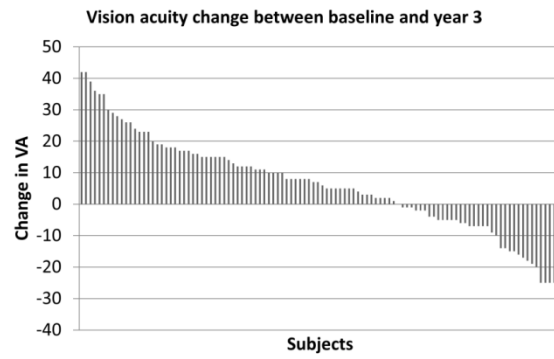

**Supplementary figure 4. The frequency distribution of the injections in years 1,2 and 3.**

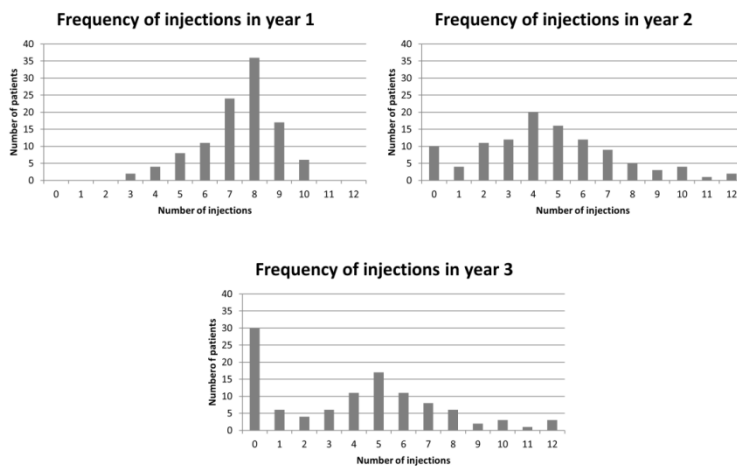

**Supplementary figure 5. The percentage of patients requiring less or more frequently injections than 8 weekly.**

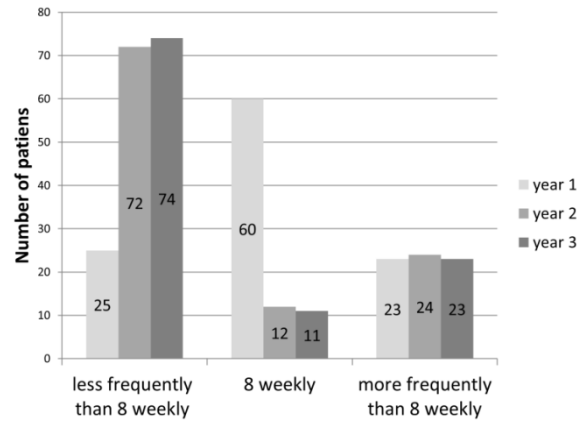

Supplement: MOESM1 [file 15916002]
